# Supplementary material for: Ecological analysis of mosquito larval communities in Burkina Faso to inform environmental monitoring of genetic control programs
Source: Research Square preprint supplement (doi:10.21203/rs.3.rs-8165654/v1), 2025-11-28
Supplement: Supplementary file 3 [file cbc2f6f0d3a181feb1867cfc.xlsx]

## Sheet: Cor_physicochemical parameters
Species	Physicochemical Parameters	Correlation	P_value	Significatnce
Anopheles larvae	Temperature	0.202	0.0191	**
Anopheles larvae	pH	-0.116	0.1789
Anopheles larvae	Turbidity	0.08	0.3588
Anopheles larvae	Oxygen	-0.159	0.0654	*
Anopheles larvae	Conductivity	0.097	0.2653
Anopheles coluzzii	Temperature	0.196	0.0229	**
Anopheles coluzzii	pH	-0.222	0.0097	**
Anopheles coluzzii	Turbidity	0.342	0.0001	**
Anopheles coluzzii	Oxygen	-0.134	0.1217
Anopheles coluzzii	Conductivity	-0.071	0.4124
Anopheles gambiae s.s.	Temperature	-0.084	0.3355
Anopheles gambiae s.s.	pH	-0.123	0.1554
Anopheles gambiae s.s.	Turbidity	-0.01	0.9092
Anopheles gambiae s.s.	Oxygen	-0.145	0.0928	*
Anopheles gambiae s.s.	Conductivity	0.102	0.2394
Anopheles arabiensis	Temperature	0.012	0.8938
Anopheles arabiensis	pH	0.034	0.6956
Anopheles arabiensis	Turbidity	-0.093	0.2825
Anopheles arabiensis	Oxygen	-0.016	0.8553
Anopheles arabiensis	Conductivity	0.259	0.0024	**
Hybrid	Temperature	0.025	0.7734
Hybrid	pH	-0.077	0.372
Hybrid	Turbidity	-0.017	0.8474
Hybrid	Oxygen	-0.045	0.6077
Hybrid	Conductivity	0.157	0.0691	*
Aedes Larvae	Temperature	-0.036	0.6777
Aedes Larvae	pH	0.031	0.7253
Aedes Larvae	Turbidity	-0.118	0.1718
Aedes Larvae	Oxygen	0.115	0.1825
Aedes Larvae	Conductivity	0.156	0.0701	*
Culex Larvae	Temperature	0.17	0.049	**
Culex Larvae	pH	0.017	0.8412
Culex Larvae	Turbidity	0.144	0.0968	*
Culex Larvae	Oxygen	0.129	0.1354
Culex Larvae	Conductivity	-0.068	0.4305
Corixidae	Temperature	-0.104	0.232
Corixidae	pH	-0.056	0.5219
Corixidae	Turbidity	0.055	0.5297
Corixidae	Oxygen	0.056	0.517
Corixidae	Conductivity	-0.01	0.9112
Dytiscidae	Temperature	0.026	0.7686
Dytiscidae	pH	0.061	0.4814
Dytiscidae	Turbidity	-0.006	0.9414
Dytiscidae	Oxygen	0.154	0.074	*
Dytiscidae	Conductivity	0.233	0.0064	**
Hydrophilidae	Temperature	-0.142	0.1007
Hydrophilidae	pH	-0.07	0.4209
Hydrophilidae	Turbidity	0.024	0.7789
Hydrophilidae	Oxygen	-0.084	0.3313
Hydrophilidae	Conductivity	0.049	0.5743
Baetidae	Temperature	0.01	0.9081
Baetidae	pH	0.046	0.5984
Baetidae	Turbidity	0.127	0.1413
Baetidae	Oxygen	0.045	0.6023
Baetidae	Conductivity	0.082	0.343
Nepidae	Temperature	-0.004	0.9595
Nepidae	pH	0.106	0.2203
Nepidae	Turbidity	-0.015	0.8662
Nepidae	Oxygen	0.101	0.2455
Nepidae	Conductivity	0.06	0.488

## Sheet: Cor_species interactions
Variable1	Variable2	Spearman_rho	P_value	Significance
Anopheles coluzzii	Anopheles coluzzii	1	0	***
Anopheles coluzzii	Anopheles gambiae s.s.	0.175643	0.039339	**
Anopheles coluzzii	Anopheles arabiensis	0.02152	0.802176
Anopheles coluzzii	Hybride (coluzzii x gambiae s.s)	0.17368	0.0416268	**
Anopheles coluzzii	Aedes spp	-0.156702	0.0664392	*
Anopheles coluzzii	Culex spp	0.0892068	0.298114
Anopheles coluzzii	Corixidae	0.338825	4.80322e-05	***
Anopheles coluzzii	Dytiscidae	0.112112	0.190477
Anopheles coluzzii	Hydrophilidae	0.0582941	0.497043
Anopheles coluzzii	Baetidae	0.122244	0.153193
Anopheles coluzzii	Nepidae	0.000406556	0.996224
Anopheles coluzzii	Libellulidae	-0.0874412	0.307817
Anopheles coluzzii	Anopheles spp	0.319636	0.000132661	***
Anopheles gambiae s.s.	Anopheles coluzzii	0.175643	0.039339	**
Anopheles gambiae s.s.	Anopheles gambiae s.s.	1	0	***
Anopheles gambiae s.s.	Anopheles arabiensis	0.747542	6.19754e-26	***
Anopheles gambiae s.s.	Hybride (coluzzii x gambiae s.s)	0.192385	0.0237831	**
Anopheles gambiae s.s.	Aedes spp	-0.299421	0.000360243	***
Anopheles gambiae s.s.	Culex spp	-0.114815	0.179938
Anopheles gambiae s.s.	Corixidae	0.139394	0.102978
Anopheles gambiae s.s.	Dytiscidae	0.203181	0.0168432	**
Anopheles gambiae s.s.	Hydrophilidae	0.108063	0.207093
Anopheles gambiae s.s.	Baetidae	0.216653	0.0107003	**
Anopheles gambiae s.s.	Nepidae	-0.0109048	0.898987
Anopheles gambiae s.s.	Libellulidae	0.0648375	0.449927
Anopheles gambiae s.s.	Anopheles spp	0.456773	1.78986e-08	***
Anopheles arabiensis	Anopheles coluzzii	0.02152	0.802176
Anopheles arabiensis	Anopheles gambiae s.s.	0.747542	6.19754e-26	***
Anopheles arabiensis	Anopheles arabiensis	1	0	***
Anopheles arabiensis	Hybride (coluzzii x gambiae s.s)	0.279014	0.000919948	***
Anopheles arabiensis	Aedes spp	-0.241403	0.00433962	***
Anopheles arabiensis	Culex spp	-0.109094	0.202766
Anopheles arabiensis	Corixidae	0.152597	0.0739727	*
Anopheles arabiensis	Dytiscidae	0.21851	0.010031	**
Anopheles arabiensis	Hydrophilidae	0.133558	0.118361
Anopheles arabiensis	Baetidae	0.216111	0.0109028	**
Anopheles arabiensis	Nepidae	0.0347326	0.685899
Anopheles arabiensis	Libellulidae	0.0624906	0.466532
Anopheles arabiensis	Anopheles spp	0.488609	1.20275e-09	***
Hybride (coluzzii x gambiae s.s)	Anopheles coluzzii	0.17368	0.0416268	**
Hybride (coluzzii x gambiae s.s)	Anopheles gambiae s.s.	0.192385	0.0237831	**
Hybride (coluzzii x gambiae s.s)	Anopheles arabiensis	0.279014	0.000919948	***
Hybride (coluzzii x gambiae s.s)	Hybride (coluzzii x gambiae s.s)	1	0	***
Hybride (coluzzii x gambiae s.s)	Aedes spp	-0.0671736	0.433734
Hybride (coluzzii x gambiae s.s)	Culex spp	-0.0653836	0.446112
Hybride (coluzzii x gambiae s.s)	Corixidae	-0.0669329	0.435387
Hybride (coluzzii x gambiae s.s)	Dytiscidae	0.128126	0.134231
Hybride (coluzzii x gambiae s.s)	Hydrophilidae	-0.0319572	0.709824
Hybride (coluzzii x gambiae s.s)	Baetidae	-0.0724017	0.398725
Hybride (coluzzii x gambiae s.s)	Nepidae	-0.0646207	0.451447
Hybride (coluzzii x gambiae s.s)	Libellulidae	-0.0319572	0.709824
Hybride (coluzzii x gambiae s.s)	Anopheles spp	0.192658	0.0235815	**
Aedes spp	Anopheles coluzzii	-0.156702	0.0664392	*
Aedes spp	Anopheles gambiae s.s.	-0.299421	0.000360243	***
Aedes spp	Anopheles arabiensis	-0.241403	0.00433962	***
Aedes spp	Hybride (coluzzii x gambiae s.s)	-0.0671736	0.433734
Aedes spp	Aedes spp	1	0	***
Aedes spp	Culex spp	0.0604517	0.481226
Aedes spp	Corixidae	-0.0711214	0.40714
Aedes spp	Dytiscidae	-0.0770015	0.369362
Aedes spp	Hydrophilidae	-0.0308635	0.719332
Aedes spp	Baetidae	-0.130502	0.127099
Aedes spp	Nepidae	0.077962	0.363403
Aedes spp	Libellulidae	-0.0308635	0.719332
Aedes spp	Anopheles spp	-0.256353	0.00240566	***
Culex spp	Anopheles coluzzii	0.0892068	0.298114
Culex spp	Anopheles gambiae s.s.	-0.114815	0.179938
Culex spp	Anopheles arabiensis	-0.109094	0.202766
Culex spp	Hybride (coluzzii x gambiae s.s)	-0.0653836	0.446112
Culex spp	Aedes spp	0.0604517	0.481226
Culex spp	Culex spp	1	0	***
Culex spp	Corixidae	0.0614653	0.47389
Culex spp	Dytiscidae	0.119967	0.161051
Culex spp	Hydrophilidae	-0.0684425	0.425079
Culex spp	Baetidae	0.15436	0.0706569	*
Culex spp	Nepidae	-0.0154655	0.857124
Culex spp	Libellulidae	0.0684425	0.425079
Culex spp	Anopheles spp	0.0562469	0.5123
Corixidae	Anopheles coluzzii	0.338825	4.80322e-05	***
Corixidae	Anopheles gambiae s.s.	0.139394	0.102978
Corixidae	Anopheles arabiensis	0.152597	0.0739727	*
Corixidae	Hybride (coluzzii x gambiae s.s)	-0.0669329	0.435387
Corixidae	Aedes spp	-0.0711214	0.40714
Corixidae	Culex spp	0.0614653	0.47389
Corixidae	Corixidae	1	0	***
Corixidae	Dytiscidae	0.341075	4.24497e-05	***
Corixidae	Hydrophilidae	0.257364	0.00230876	***
Corixidae	Baetidae	0.411798	5.22133e-07	***
Corixidae	Nepidae	-0.064577	0.451754
Corixidae	Libellulidae	-0.0319356	0.710011
Corixidae	Anopheles spp	0.159238	0.0621079	*
Dytiscidae	Anopheles coluzzii	0.112112	0.190477
Dytiscidae	Anopheles gambiae s.s.	0.203181	0.0168432	**
Dytiscidae	Anopheles arabiensis	0.21851	0.010031	**
Dytiscidae	Hybride (coluzzii x gambiae s.s)	0.128126	0.134231
Dytiscidae	Aedes spp	-0.0770015	0.369362
Dytiscidae	Culex spp	0.119967	0.161051
Dytiscidae	Corixidae	0.341075	4.24497e-05	***
Dytiscidae	Dytiscidae	1	0	***
Dytiscidae	Hydrophilidae	0.394571	1.6782e-06	***
Dytiscidae	Baetidae	0.333666	6.35382e-05	***
Dytiscidae	Nepidae	-0.0368244	0.668069
Dytiscidae	Libellulidae	-0.018211	0.832105
Dytiscidae	Anopheles spp	0.131364	0.124587
Hydrophilidae	Anopheles coluzzii	0.0582941	0.497043
Hydrophilidae	Anopheles gambiae s.s.	0.108063	0.207093
Hydrophilidae	Anopheles arabiensis	0.133558	0.118361
Hydrophilidae	Hybride (coluzzii x gambiae s.s)	-0.0319572	0.709824
Hydrophilidae	Aedes spp	-0.0308635	0.719332
Hydrophilidae	Culex spp	-0.0684425	0.425079
Hydrophilidae	Corixidae	0.257364	0.00230876	***
Hydrophilidae	Dytiscidae	0.394571	1.6782e-06	***
Hydrophilidae	Hydrophilidae	1	0	***
Hydrophilidae	Baetidae	-0.030864	0.719328
Hydrophilidae	Nepidae	-0.0147599	0.863578
Hydrophilidae	Libellulidae	-0.00729927	0.932287
Hydrophilidae	Anopheles spp	0.146981	0.0853801	*
Baetidae	Anopheles coluzzii	0.122244	0.153193
Baetidae	Anopheles gambiae s.s.	0.216653	0.0107003	**
Baetidae	Anopheles arabiensis	0.216111	0.0109028	**
Baetidae	Hybride (coluzzii x gambiae s.s)	-0.0724017	0.398725
Baetidae	Aedes spp	-0.130502	0.127099
Baetidae	Culex spp	0.15436	0.0706569	*
Baetidae	Corixidae	0.411798	5.22133e-07	***
Baetidae	Dytiscidae	0.333666	6.35382e-05	***
Baetidae	Hydrophilidae	-0.030864	0.719328
Baetidae	Baetidae	1	0	***
Baetidae	Nepidae	-0.0624101	0.467108
Baetidae	Libellulidae	-0.030864	0.719328
Baetidae	Anopheles spp	0.121618	0.155323
Nepidae	Anopheles coluzzii	0.000406556	0.996224
Nepidae	Anopheles gambiae s.s.	-0.0109048	0.898987
Nepidae	Anopheles arabiensis	0.0347326	0.685899
Nepidae	Hybride (coluzzii x gambiae s.s)	-0.0646207	0.451447
Nepidae	Aedes spp	0.077962	0.363403
Nepidae	Culex spp	-0.0154655	0.857124
Nepidae	Corixidae	-0.064577	0.451754
Nepidae	Dytiscidae	-0.0368244	0.668069
Nepidae	Hydrophilidae	-0.0147599	0.863578
Nepidae	Baetidae	-0.0624101	0.467108
Nepidae	Nepidae	1	0	***
Nepidae	Libellulidae	-0.0147599	0.863578
Nepidae	Anopheles spp	-0.0556661	0.516673
Libellulidae	Anopheles coluzzii	-0.0874412	0.307817
Libellulidae	Anopheles gambiae s.s.	0.0648375	0.449927
Libellulidae	Anopheles arabiensis	0.0624906	0.466532
Libellulidae	Hybride (coluzzii x gambiae s.s)	-0.0319572	0.709824
Libellulidae	Aedes spp	-0.0308635	0.719332
Libellulidae	Culex spp	0.0684425	0.425079
Libellulidae	Corixidae	-0.0319356	0.710011
Libellulidae	Dytiscidae	-0.018211	0.832105
Libellulidae	Hydrophilidae	-0.00729927	0.932287
Libellulidae	Baetidae	-0.030864	0.719328
Libellulidae	Nepidae	-0.0147599	0.863578
Libellulidae	Libellulidae	1	0	***
Libellulidae	Anopheles spp	-0.0793913	0.354646
Anopheles spp	Anopheles coluzzii	0.319636	0.000132661	***
Anopheles spp	Anopheles gambiae s.s.	0.456773	1.78986e-08	***
Anopheles spp	Anopheles arabiensis	0.488609	1.20275e-09	***
Anopheles spp	Hybride (coluzzii x gambiae s.s)	0.192658	0.0235815	**
Anopheles spp	Aedes spp	-0.256353	0.00240566	***
Anopheles spp	Culex spp	0.0562469	0.5123
Anopheles spp	Corixidae	0.159238	0.0621079	*
Anopheles spp	Dytiscidae	0.131364	0.124587
Anopheles spp	Hydrophilidae	0.146981	0.0853801	*
Anopheles spp	Baetidae	0.121618	0.155323
Anopheles spp	Nepidae	-0.0556661	0.516673
Anopheles spp	Libellulidae	-0.0793913	0.354646
Anopheles spp	Anopheles spp	1	0	***
